# Supplementary material for: Epigenetic memory via concordant DNA methylation is inversely correlated to developmental potential of mammalian cells
Source: PLoS Genet. 2017 Nov 6;13(11):e1007060. doi: 10.1371/journal.pgen.1007060 (PMC5690686; doi:10.1371/journal.pgen.1007060)
Supplement: S3 Table — We collected double-stranded DNA methylation patterns from two species—mouse and human—and several loci using bisulfite conversion under either low-molarity/temperature (“LowMT”) or high-molarity/temperature (“HighMT”) conditions [49]. For each data set, we counted methylated (M), hemimethylated (H), and unmethylated (U) dyads, and used these values to infer methylation frequency, m, unmethylated dyad frequency, U, and the ratio of concordance preference, RCP. Inferences for (m, U) and for RCP incorporated correction for conversion error, as described in S3 Text. We estimated approximate 95% confidence intervals by bootstrapping and applied the BCa correction to obtain bias-corrected confidence intervals and point estimates, as described in S7 Text. Both uncorrected and BCa-corrected intervals and point estimates are listed here. (XLSX) [file pgen.1007060.s005.xlsx]

## Sheet: Table S3
Locus	Sample Name	Data origin (This work if blank)	failed conv rate	inapp. conv rate	Dyads error uncorrected	Dyads error corrected	corrected m	corrected U	RCP raw	95% low	95% high	RCP BCa	95% low BCa	95% high BCa
FMR1	Lym, FX patient	[28]	Low	Low	(1525, 115, 98)	(1620, 17.4, 96.5)	0.939471	0.055511	45.3871	18.5166	8.20099e+07	45.1825	18.0948	81301160
	Lym, normal	[22, 27]	Low	Low	(3046, 237, 435)	(3240, 40.9, 433)	0.877981	0.116518	57.9544	28.8689	802.142	57.1828	27.4992	403.93
	FX Fibroblast		High	High	(267, 17, 129)	(276, 5.68, 131)	0.67577	0.317358	67.0434	20.4924	3.95941e+07	63.846	14.5463	38672410
	IMR90 Fibroblast		High	High	(68, 10, 102)	(70.3, 6.04, 104)	0.407385	0.575848	28.286	10.5798	1.80789e+07	27.2285	8.3698	585.253
G6PD	Lym	[22]	Low	Low	(1099, 144, 215)	(1170, 75.0, 213)	0.828316	0.145976	13.3145	8.77771	24.7519	13.2305	8.46669	23.1512
LEP	Leukocytes, Male	[28]	Low	Low	(119, 17, 179)	(127, 8.60, 180)	0.415903	0.570439	35.0723	15.2566	3.08303e+07	34.2009	13.3882	325.924
	Leukocytes, Female	[22, 28]	Low	Low	(163, 16, 220)	(174, 4.40, 221)	0.44055	0.553938	89.0594	28.734	3.98528e+07	85.6533	25.023	39739520
	Adipose, Female	[22, 28]	Low	Low	(271, 61, 1348)	(288, 36.8, 1350)	0.182676	0.806368	33.9642	21.9861	63.9779	33.7867	21.2525	60.1922
LINE1	H9p37, U		High	High	(544, 104, 64)	(562, 86.3, 63.5)	0.850239	0.0891411	4.37654	2.9104	6.70167	4.40648	2.93431	6.76359
	H9p37, D		High	High	(615, 51, 53)	(636, 29.6, 53.2)	0.905396	0.0740318	12.4413	6.48731	32.0515	12.2889	5.75632	26.8795
	H9p81, U		High	High	(98, 29, 42)	(101, 25.5, 42.3)	0.67434	0.250077	5.11964	2.46204	13.4174	5.20256	2.35254	12.5322
	H9p81, D		High	High	(215, 15, 31)	(222, 7.21, 31.4)	0.86606	0.120118	23.149	9.39814	1.60579e+07	23.1816	8.76389	14364620
	FSH iPS, U		High	High	(753, 147, 57)	(778, 123, 55.7)	0.877493	0.0581517	3.37895	2.28581	4.91674	3.40886	2.34122	5.03902
	FSH iPS, D		High	High	(452, 31, 19)	(468, 15.4, 18.9)	0.946914	0.0377066	12.1862	5.58269	53.554	12.2645	5.40878	48.228
	IMR90 Fibroblast		High	High	(1356, 135, 217)	(1400, 86.6, 219)	0.846499	0.128151	12.7966	9.28711	18.8692	12.7762	9.14695	18.4926
	IMR90 iPS, U		High	High	(1215, 336, 207)	(1250, 298, 205)	0.798525	0.116678	3.40313	2.6394	4.38178	3.41364	2.6492	4.3986
	FX Fibroblast		High	High	(2016, 113, 136)	(2090, 42.0, 137)	0.930224	0.0605013	25.4499	15.0182	61.549	25.2685	14.2772	54.8298
	FX iPS1, U		High	High	(1238, 256, 157)	(1280, 216, 156)	0.840282	0.0942769	4.1301	3.14066	5.50779	4.14105	3.14257	5.51143
	FX iPS2, U		High	High	(1163, 347, 293)	(1200, 310, 292)	0.751907	0.162193	3.82615	3.00442	4.92971	3.83314	2.99985	4.92139
Lep	CGR8	[30]	Low	Low	(110, 73, 177)	(117, 67.2, 176)	0.418164	0.488503	4.26802	2.90019	6.73304	4.25495	2.81813	6.50603
	J1 Dnmt1KO	[30]	Low	Low	(9, 57, 294)	(9.41, 56.6, 294)	0.104733	0.816663	1.85846	0.966285	2.87509	1.89698	1.07841	3.06371
	J1 Dnmt3aKO	[30]	Low	Low	(110, 45, 205)	(117, 38.0, 205)	0.377906	0.569272	8.14399	5.44649	13.658	8.1139	5.28818	13.0837
	J1 Dnmt3bKo	[30]	Low	Low	(176, 55, 129)	(187, 44.5, 128)	0.582067	0.356143	6.96654	5.03892	10.3818	6.96791	4.95317	10.2747
	Somatic Tissues	[28]	Low	Low	(214, 23, 64)	(228, 9.24, 63.9)	0.772431	0.212219	26.1136	11.8729	2035.49	25.9123	11.0374	257.413
